# Supplementary material for: Neighbourhood watch: genomic epidemiology of SARS-CoV-2 variants circulating in a German federal state, Mecklenburg-Western Pomerania, in 2020–2022
Source: PubMed Central journal article supplement (PMC10446807; doi:10.1080/22221751.2023.2245916), 2023-08-22
Supplement: TEMI_A_2245916_SM3288.pdf [file TEMI_A_2245916_SM3288.pdf]

# Figure S2

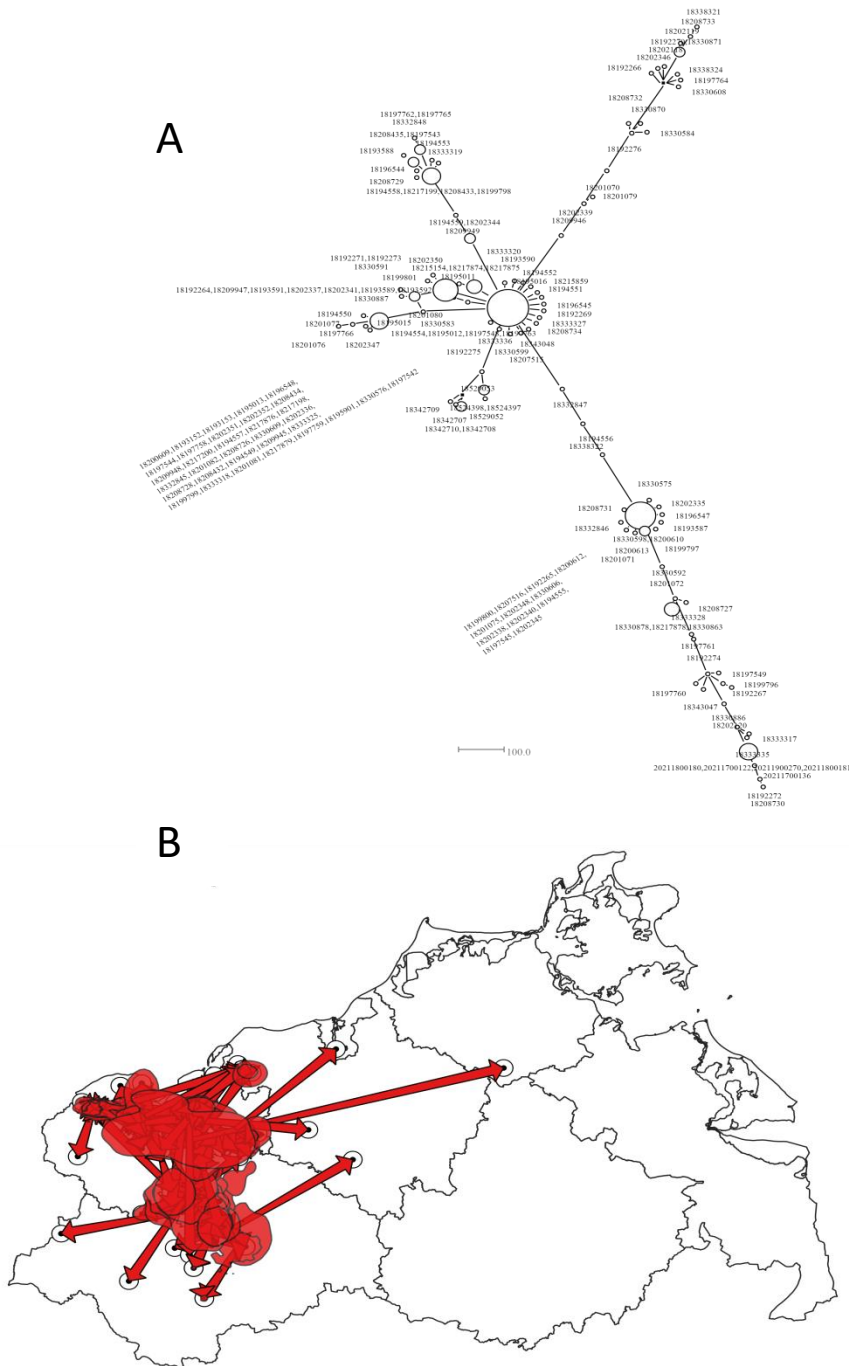

**Figure S2. A.** Median-joining networks of SARS-CoV-2 clade 20J (gamma) genomes. **B.** Connected cluster areas (polygons) with their directed spread (arrows) of SARS-CoV-2 clade Gamma genomes inferred by spatial-time phylogeography.
